Title: Expansion of Human Papillomavirus-Specific T Cells in Periphery and Cervix in a Therapeutic Vaccine Recipient Whose Cervical High-Grade Squamous Intraepithelial Lesion Regressed

Takeo Shibata<sup>a,b</sup>, Sumit Shah<sup>a</sup>, Teresa Evans<sup>a</sup>, Hannah Coleman<sup>a</sup>, Benjamin J. Lieblong<sup>a</sup>, Horace J. Spencer<sup>c</sup>, C. Matthew Quick<sup>a</sup>, Toshiyuki Sasagawa<sup>b</sup>, Owen W. Stephens<sup>e</sup>, Erich Peterson<sup>e</sup>, Donald Johann, Jr.<sup>d</sup>, Yong-Chen Lu<sup>f</sup>, and Mayumi Nakagawa<sup>a\*</sup>

a Department of Pathology, University of Arkansas for Medical Sciences, Little Rock, AR, USA

b Department of Obstetrics and Gynecology, Kanazawa Medical University, Uchinada, Ishikawa, Japan

c Department of Biostatistics, University of Arkansas for Medical Sciences, Little Rock, AR, USA

d Department of Internal Medicine (Hematology-Oncology Division), University of Arkansas for Medical Sciences, Little Rock, AR, USA

e Department of Biomedical Informatics, University of Arkansas for Medical Sciences, Little Rock, AR USA

f Surgery Branch, National Cancer Institute, National Institutes of Health, Bethesda, MD, USA

Running title: HPV-Specific T Cells in a Therapeutic Vaccine Recipient

\* Corresponding author: Mayumi Nakagawa, M.D., Ph.D.

Department of Pathology, University of Arkansas for Medical Sciences

4301 W. Markham St. Slot 502, Little Rock AR 72205

Phone (501) 686-8635, Fax (501) 526-4621

mnakagawa@uams.edu

## Abstract

Advances in high-throughput sequencing have revolutionized the manner with which we can study T cell responses. We describe a woman who received a human papillomavirus (HPV) therapeutic vaccine called PepCan, and experienced complete resolution of her cervical high-grade squamous intraepithelial lesion. By performing bulk T cell receptor (TCR)  $\beta$  deep sequencing of peripheral blood mononuclear cells before and after 4 vaccinations, 70 putatively vaccine-specific clonotypes were identified for being significantly increased using a beta-binomial model. Interferon- $\gamma$  enzyme-linked immunospot assay identified significantly increased HPV-specific T cell response in the HPV 16 E6 91-115 region after 4 vaccinations ( $p=0.023$ ). The T cells with the specificity to this region was sorted and analyzed using single-cell RNA-seq and TCR sequencing, HPV specificity of the 60 of the 70 clonotypes identified to be vaccine-specific was demonstrated. TCR  $\beta$  bulk sequencing of the cervical liquid-based cytology samples and cervical formalin-fixed paraffin-embedded samples before and after 4 vaccinations demonstrated the presence of these HPV-specific T cells in the cervix. Combining traditional and cutting-edge immunomonitoring techniques enabled us to demonstrate expansion of HPV-antigen specific T cells in the periphery and cervix.

**Keywords:** Cervical intraepithelial neoplasia, Clonal expansion, Human Papillomavirus, T cell receptor, Therapeutic vaccine

## Introduction

Human papillomavirus (HPV) is best known as the causative agent of cervical cancer, but it can also cause cancers at other mucosal sites including the anus, oropharynx, penis, vagina, and vulva. It is estimated that HPV is responsible for 42,700 cancers in the US each year,<sup>1</sup> including more than 90% of anal and cervical cancers and about 70% of oropharyngeal, vaginal, and vulvar cancers.<sup>1</sup> Incidences of HPV-associated anal and oropharyngeal cancers have increased notably, and, although incidence of cervical cancer has stabilized after significant decreases over the past several decades,<sup>2</sup> this remains the fourth most common cancer among women globally.<sup>3</sup> The available prophylactic vaccines are effective for preventing HPV infections, but they cannot eliminate established infections; therapeutic vaccines could fill this need, but none are currently available.<sup>4</sup> Such vaccines would benefit young women (narrowly, those  $\leq 24$  years old) and, broadly, any woman who plans to become pregnant<sup>5</sup> because increased incidence of preterm delivery (from 4.4% to 8.9%) is associated with surgical treatments (e.g., loop electrical excision procedure [LEEP]) for high-grade squamous intraepithelial lesion (HSIL).<sup>5,6</sup>

We evaluated the safety of an HPV therapeutic vaccine (PepCan) in a single-center, single-arm, dose-escalation Phase I clinical treating women with biopsy-proven HSILs (NCT01653249).<sup>7,8</sup> PepCan consists of four current good manufacturing practice (cGMP)-grade peptides covering the human papillomavirus type 16 (HPV 16) E6 protein (amino acids 1-45, 46-80, 81-115, and 116-158) and *Candida albicans* skin test reagent (Candin®, Nielsen Biosciences, San Diego, CA). PepCan was shown to be safe, and resulted in a histological regression rate of 45% which is roughly double that of a historical placebo (22%).<sup>9</sup> In addition,

circulating, peripheral T-helper type 1 (Th1) cells ( $p=0.0004$ ) was increased, and the HPV 16 viral load was significantly decreased ( $p=0.008$ ).<sup>7</sup>

Recent advances in high-throughput sequencing technology have enhanced our ability to appreciate how the T cell receptor (TCR) repertoire may reveal the role of T cells in immunotherapy for HPV-related diseases.<sup>10-12</sup> The actual diversity present in a human body is estimated to be around  $10^{13}$  unique TCRs.<sup>13</sup> Next generation sequencing can facilitate the simultaneous analysis of millions of TCR sequences. Understanding the cytotoxic T cell repertoire, in parallel with observing clinical responses, would be essential for revealing immune mechanisms behind immunotherapies for chronic infectious diseases or cancer.<sup>10,14-17</sup> In this article, we utilize multiplexed PCR-based TCR sequencing using genomic DNA to characterize TCR repertoires in peripheral blood mononuclear cells (PBMCs), stimulated CD3 cells, formalin-fixed paraffin-embedded (FFPE) tissues, and liquid-based cytology (LBC) samples from one subject who was a histologic responder from the Phase I clinical trial mentioned above. In addition, single-cell RNA-seq and TCR sequencing approaches were utilized to reveal the TCR sequences of HPV-specific T cells with a specificity to the HPV 16 91-115 amino acid region revealed by the enzyme-linked immunospot (ELISPOT) assay. We provide a proof-of-principle that a traditional immune assay, such as ELISPOT, can be combined with a cutting-edge technology to characterize HPV-specific T cells.

## Results

### Clinical trial design and vaccine response

The subject, a 41-year old Caucasian woman, participated in a single-arm, open-label Phase I clinical trial of an HPV therapeutic vaccine, PepCan, for treating biopsy-proven cervical HSILs (Figure 1A).<sup>7,8</sup> At study entry, she had cervical intraepithelial neoplasia 3 (CIN 3), and was positive for HPV types 16, 31, and 58. At study exit (12 weeks after vaccination series completion), her LEEP biopsy was benign but was noted to have marked lymphocytic infiltration. Furthermore, she was noted to have leukocytosis and lymphocytosis (Table 1), and was positive for HPV 40 at exit. ELISPOT assay showed pre-existing HPV-specific response and responses to multiple HPV regions detected after vaccination. The response to one region, HPV 16 E6 91-115, was significantly increased (Figure 1B,  $p=0.023$ ). Peripheral immune cell profiling showed increased percentage of Th1 cells, but unchanged levels of Tregs and Th2 cells (Figure 1C). Her HLA types were HLA-A\*24/A\*30, B\*15/B\*51, C\*01/C\*03, DPB1\*02/DPB1\*02, DQB1\*03/DQB1\*06, and DRB1\*11/DRB1\*13.

### Multiplexed PCR-based TCR $\beta$ chain deep sequencing

All samples examined (n=10: PBMC and stimulated CD3 samples at pre-, post-2, and post-4 vaccinations; and FFPE and LBC samples at pre- and post-4 vaccinations) yielded sufficient quantities of DNA for bulk TCR sequencing. In total, 749,417 clonotypes, and 1,256,277 T cells were identified in these 10 samples (Table 2). The numbers of total T cells and clonotypes were higher in PBMC than in stimulated CD3 (Figure 2). In cervical samples, the clonotypes (372,344,699 and 6,748) and total T cells (403,382,814, and 10,731) were detected in FFPE (pre and post-4) and LBC (pre and post-4). The productive clonality was increased after 4 vaccinations in PBMC, stimulated CD3, and LBC samples, and the maximum productive

frequencies at least doubled in all sample types (Figure 2). The T cell fraction was highest in stimulated CD3 cells, and lowest in LBCs. DNA per cell was similar among PBMC, stimulated CD3 cells, and LBC (ranging from 0.0061 ng/cell to 0.011 ng/cell), but much higher in FFPE samples (0.714 ng/cell for pre-vaccination and 1.27 ng/cell for post-4 vaccinations), possibly reflecting lower quality DNA.

The percentages of the top 15 most frequent clonotypes were significantly increased after 4 vaccinations in all sample types except for FFPE (Figure 3A). Venn diagrams of clonotypes detected in PBMC, LBC, and FFPE at pre-vaccination and post-4 vaccinations revealed that some clonotypes can be detected in all sample types, reflecting the capacity of at least a subset of T cells to traffic to the cervix (Figure 3B). A beta-binomial model, which accounts for variance due to random sampling from a highly diverse repertoire and time-dependent variance for identifying clinically relevant expansion of T cells,<sup>18</sup> was used to identify putatively vaccine-specific TCRs using pre and post-4 PBMC samples. Seventy putatively vaccine-specific TCRs were identified using the CDR3 nucleotide sequences (Supplementary Table 1). The numbers of such clonotypes and total T cells in pre- and post-4 vaccination FFPE (1 and 9 clonotypes, and 1 and 13 total T cells, respectively) and pre- and post-4 vaccination LBC [14 and 47 clonotypes (Figure 3C), and 33 and 1,523 total T cells respectively] showed that LBC may be more an informative sample type because of greater T cell abundance.

### **Single-cell RNA-seq and TCR sequencing**

Of  $8.5 \times 10^6$  peptide (3 15-mer peptides covering the HPV 16 E6 91-115 region)-stimulated and IFN- $\gamma$  labeled cells,  $1.3 \times 10^6$  (15.3%) were positively sorted. For the TCR sequencing, the estimated number of cells was 12,240 with mean read pairs of 13,678 per cell. Most (10,246 of 12,240 or 83.7%) cells contained productive V-J spanning pairs. The TCR  $\beta$

amino acid sequences of the 4 clonotypes with a frequency of  $\geq 5\%$  among the IFN- $\gamma$  positive cells are shown in Table 3.

The single-cell RNA-seq analysis revealed an estimated 15,114 total number of cells, 32,659 mean reads per cell, and 2,047 median number of genes per cell. The representation of the total unique molecular identifiers (UMI) counts for each cell-barcode revealed various levels of gene expression among the IFN- $\gamma$  producing cells, and clustering showed IFN- $\gamma$  mRNA expression only in a minority of cells belonging to cluster 13 (Figure 4).

### **Tracking of the HPV 16 E6 91-115 specific T cells**

Using the TCR  $\beta$  CDR3 sequences of the 4 clonotypes specific for HPV 16 E6 91-115, their frequencies in PBMC, LBC, and FFPE samples were determined using TCR  $\beta$  chain sequencing (Figure 5). All 4 clonotypes were detectable in PBMC and LBC prior to vaccination, and their expansion after 4 vaccinations is shown. Only one T cell of clonotype 2 is detectable prior to vaccination in FFPE. All 4 clonotypes are detectable after 4 vaccinations, but only at 2 T cells for clonotypes 1, 3, and 4 and 1 T cell for clonotypes 2. As much fewer cells were detected in FFPE, LBC was a better source for assessing T cell populations, at least in this subject. Of the 70 clonotypes identified to be putatively vaccine-specific using the beta-binomial model, 60 clonotypes were shown to be HPV 16 E6 91-115 specific (Supplementary Table 1). Clonotype 1 was the most abundant clonotype in PBMC and LBC, and the second most abundant clonotype in stimulated CD3.

## Discussion

This was a proof-of-concept study to demonstrate the utility of TCR analyses using high-throughput sequencing technology in the context of HPV therapeutic vaccine trials. The earliest evidence of the link between HPV and cervical cancer was discovered in 1983 by Harald zur Hausen and his colleagues.<sup>19</sup> A Nobel Prize was later awarded. To date, over 200 HPV types have been described.<sup>20</sup> HPV antigens are ideal targets for cancer immunotherapy because they are foreign. Various versions of investigational HPV therapeutic vaccines have been in clinical trials for about the last 30 years, but none has been approved by the United States Food and Drug Administration. Investigational HPV therapeutic vaccines have been tested for many indications including clearance of HPV 16 and/or 18 infection,<sup>21</sup> HSIL regression,<sup>7,8,22</sup> prevention of recurrence of squamous cell carcinoma of head and neck (HNC),<sup>23</sup> treatment of advanced stage cervical cancer,<sup>24,25</sup> and treatment of advanced stage HNC.<sup>26</sup> The assessment of vaccine efficacy depends on the indication being tested. For HPV 16 infection clearance, HPV-DNA typing was used,<sup>21</sup> and biopsies were utilized to evaluate HSIL regression.<sup>7,8,22</sup> Lack of recurrence within a 2 year period is being used for assessing prevention of recurrence.<sup>23</sup> Antitumor efficacy was examined using the numbers of patients with complete and partial response, tumor shrinkage, duration of response.<sup>25</sup>

Unlike the HPV prophylactic vaccines which work by inducing production of neutralizing antibodies,<sup>27,28</sup> the HPV therapeutic vaccines are believed to cast their effects through stimulation of cell-mediated immunity, mainly T cells. Therefore, assessments of T cell immune response should be included in the endpoints of clinical trials. Such implementation varies widely among the clinical trials because T cell assays are technically challenging. In Maciag *et al.*,<sup>24</sup> the investigators attempted to perform IFN- $\gamma$  ELISPOT assay using pooled



peptides, but most samples were not suitable due to low yield and viability after thawing. Of the 3 patients with a sufficient amounts of cells available to perform the assay, only one demonstrated an HPV-specific T cell response after vaccination. HPV 16 E7 short and long peptides were pooled before testing, so no information as to which portion of the protein contained immunogenic epitopes was obtained.<sup>24</sup> In the GTL001 trial, van Domme *et al.* performed *ex vivo* IFN- $\gamma$  ELISPOT assay with pooled HPV 16 E7 peptides or HPV 18 E7 peptides. Overall, 18 of 31 (58.1%) of patients who received any dose of GTL001 with imiquimod demonstrated positive ELISPOT results to either protein. Trimble *et al.* also tested immune responses using IFN- $\gamma$  ELISPOT assay and intracellular cytokine staining for assessment of T cell immunity. Significantly higher responses were reported for patients who received the VGX-3100 vaccine compared to those who received placebo. As peptides were pooled for each protein tested (HPV 16 E6, HPV 16 E7, HPV 18 E6, and HPV 18 E7), information on which portion of the protein contained the immunogenic epitopes was not determined.<sup>22</sup> In the clinical trial which treated patients with advance HNC with ISA100 and nivolumab, the investigators performed IFN- $\gamma$  ELISPOT assay for HPV 16 E6 and E7 again using peptide pools. Although variable increases in the number of HPV-specific T cells were observed after vaccination in both responders and nonresponders. Furthermore, the immune response did not correlate with efficacy endpoints.<sup>26</sup> In addition to IFN- $\gamma$  ELISPOT assay, Melief *et al.* performed lymphocyte stimulation test, intracellular cytokine staining, and cytometric bead arrays to assess immune responses. In all 64 patients who received ISA101 vaccination, HPV 16 E6 and/or E7-specific T cell responses to one or more of 6 peptide pools (4 pools for HPV 16 E6 and 2 pools for HPV 16 7 protein) was demonstrated. Our IFN- $\gamma$  ELISPOT protocol distinguishes itself among others in that we tested for 10 HPV 16 E6 peptides pools and 6 HPV

16 E7 peptide pools (Fig. 1B).<sup>7,8</sup> Therefore, the locations of the antigenic epitopes can be narrowed down to 25 amino acid regions. This characteristic of our assay was key to identifying a significant response to the HPV 16 E6 91-115 region, and subsequent isolation of T cells based on IFN- $\gamma$  secretion. Overall, 61% (19 of 31) of vaccine recipients demonstrated a new T cell response to at least one region of HPV 16 E6 protein.<sup>7,8</sup> Furthermore, the responses were statistically significant in 42% (13 of 31) of the subjects.<sup>7,8</sup> However, such responses observed after vaccination in the peripheral blood did not correlate with whether the cervical HSIL lesions regressed. It is possible that the vaccine-induced HPV-specific T cells failed to reach the cervix in some subjects.

TCRs are highly diverse heterodimers consisting of  $\alpha$  and  $\beta$  chains in the majority of T cells. However, 1-5% of T cells express  $\gamma\delta$  chains.<sup>29</sup> Similar to B cell receptors, the TCR chains contains a variable region responsible for antigen recognition, and a constant region. The variable region of the  $\alpha$  and  $\delta$  chains is encoded by recombined variable (V) and joining (J) genes. Additionally for the  $\beta$  and  $\gamma$  chains, diversity (D) genes are also recombined (i.e., VDJ recombination). Therefore, the  $\beta$  and  $\gamma$  chains are more diverse than the  $\alpha$  and  $\delta$  chains. The advent of high-throughput sequencing made it possible to probe into the complexity of such TCRs. In the current study, we employed TCR  $\beta$  chain deep sequencing using bulk DNA and single-cell RNA-based TCR analysis using mRNA. The former has the advantage of using DNA, which can be extracted from LBC and FFPE samples; therefore, live cells are not necessary. The latter was utilized to analyze IFN- $\gamma$  secreting HPV 16 E6 91-115 specific T cells. Information on TCR  $\alpha$  and  $\beta$  sequences and their pairings was obtained, and the gene expression profiles of individual cells was examined. We demonstrated that using the information from a traditional IFN- $\gamma$  ELISPOT assay in combination with TCR sequencing enables us to demonstrate the

expansion of HPV-specific T cells and their presence in the cervix. In addition to demonstrating the information on TCR  $\alpha$  and  $\beta$  chain pairings, the single-cell RNA based method has the advantage of yielding the entire sequences of the  $\alpha$  and  $\beta$  chains. This would enable construction of the TCRs in viral vectors with which their specificities can be verified.<sup>30,31</sup> Furthermore, such engineered T cells can be used for immunotherapy as demonstrated by Draper and colleagues<sup>32</sup>. They used T cells genetically engineered to express the TCR of HPV 16 E6 29-38 (TIHDIILECV) epitope restricted by HLA-A\*02:01. These engineered T cells were shown to be cytotoxic for HPV 16 positive cervical, and HNC cell lines.<sup>32</sup> The limitation of our current study was that we only examined one subject in this proof-of-concept study. As the Phase II clinical trial of PepCan is ongoing (NCT02481414), additional analyses of Phase II participants would aid in determining the generalizability of the findings of this study.

## Methods

### Ethics

This study was approved by the Institutional Review Board at the University of Arkansas for Medical Sciences (IRB number 130662) and written informed consent was obtained.

### Subject, clinical trial design, and laboratory analyses

This open-label single center dose-escalation Phase I clinical trial of PepCan was reported previously.<sup>7,8</sup> Subject 6 was selected for the current study because she was a vaccine responder, and sufficient amounts of her samples were available for further analyses. Briefly, subjects qualified for vaccination if biopsy-proven CIN 2 and/or CIN 3 (Figure 1). PepCan (subject 6 received 50 µg/peptide dose) was given 4 times 3 weeks apart, and LEEP was performed 12 weeks after the last vaccination. Cervical LBC samples (ThinPrep, Hologic, Marlborough, MA) were collected for HPV typing before vaccination at the time of qualifying biopsy, and after 4 vaccinations at the time of LEEP. Blood was drawn before vaccination, after 2 vaccinations, and after 4 vaccinations, and routine clinical laboratory tests (complete blood count, sodium, potassium, chloride, carbon dioxide, blood urea nitrogen, creatinine, aspartate transaminase, alanine transaminase, lactate dehydrogenase,  $\gamma$ -glutamyl transpeptidase, total bilirubin, and direct bilirubin) were performed. PBMCs were isolated using the ficoll density gradient method. Cells were stored in liquid nitrogen tanks while LBC samples were kept in -80°C freezers. FFPE samples were stored at room temperature.

Research laboratory analyses performed as a part of the clinical trial included HPV typing (Linear Array HPV Genotyping Test, Roche Molecular Diagnostics, Pleasanton, CA), IFN- $\gamma$  ELISPOT assay, fluorescent-activated cell sorter analysis of peripheral Th1, Th2, and Treg cells, and HLA class I and class II low-resolution typing (One Lambda, West Hills, CA).

The Linear Array HPV Genotyping Test detects 37 individual HPV types (6, 11, 16, 18, 26, 31, 33, 35, 39, 40, 42, 45, 51, 52, 53, 54, 55, 56, 58, 59, 61, 62, 64, 66, 67, 68, 69, 70, 71, 72, 73, 81, 82, 83, 84, IS 39, and CP6108). For the ELISPOT assay, magnetically selected CD3 T cells were stimulated with autologous monocyte-derived dendritic cells pulsed with HPV 16 E6 or E7 using recombinant vaccinia viruses and recombinant GST fusion proteins twice with a one-week duration for each stimulation. The assay was performed in triplicates using overlapping HPV 16 E6 and E7 peptides covering HPV 16 E6 1-25, 16-40, 31-55, 45-70, 61-85, 76-100, 91-115, 106-130, 121-145, 136-158 and HPV 16 E7 16-40, 31-55, 46-70, 61-85, and 76-98 regions. PBMCs were stained for CD4, CD25, T-bet, GATA3, and Foxp3. The percentage of CD4 cells positive for T-bet represented Th1 cells, those positive for GATA3 represented Th2 cells, and those positive for CD25 and FoxP3 represented Tregs.

### **Multiplexed PCR-based TCR sequencing**

The TCR  $\beta$  CDR3 regions were PCR-amplified and sequenced (immunoSEQ, Adaptive Biotechnologies, Seattle, WA)<sup>33</sup> using genomic DNA from PBMCs (pre-, post-2, and post-4), stimulated CD3 T cells (pre, post-2, and post-4), LBC (pre and post-4), and FFPE (pre and post-4). Using bias-controlled V and J gene primers, the rearranged V(D)J segments were amplified and sequenced. A clustering algorithm was used to correct for sequencing errors, and the CDR3 segments were annotated according to the International ImMunoGeneTicsCollaboration<sup>34,35</sup> to identify the V, D, and J genes that contributed to each rearrangement. A mixture of synthetic TCR analogs was used in PCR to estimate the number of cells bearing each unique TCR sequence.<sup>36</sup> “Detailed rearrangements”, “Track Rearrangements”, “Venn Diagram”, “Differential Abundance”, and “Scatterplot with Annotation” features of the immunoSeq analyzer<sup>37</sup> were used to analyze data.

## Single-cell RNA-seq of HPV-specific T cells

In order to obtain TCR V $\alpha$  and V $\beta$  sequences of T cells specific for HPV 16 E6 91-115 (Figure 1B), such T cells were selected using a human IFN- $\gamma$  Secretion Assay – Cell Enrichment and Detection Kit (Miltenyi Biotec, Auburn, CA) following the manufacturer’s instructions as previously described.<sup>38-42</sup> Post-4 PBMC sample cryopreserved after monocyte depletion was thawed and cultured overnight in Yssel’s media (Gemini Bio Products, West Sacramento, CA) with 1% human serum and 1,200 IU/ml of recombinant human interleukin-2 (R&D Systems, Inc., Minneapolis, MN). As a positive control, healthy donor PBMC mixed with 1% HPV 16 E6 52-61 (FAFRDLCIVY)-specific T cell clone cells was processed in the same manner. The cells were stimulated for 3 h with 10  $\mu$ M each of peptides in RPMI1640 media plus 5% human serum: FAFRDLCIVY for the positive control, and the three 15-mer overlapping peptides covering the E6 91-115 region (91-105, YGTTLEQQYNKPLCD; 96-110, EQQYNKPLCDLLIRC; 101-115, KPLCDLLIRCINCQK). IFN- $\gamma$  secreting cells were labeled using the IFN- $\gamma$  catch reagent and phycoerythrin (PE)-labeled IFN- $\gamma$  detection antibody. The positive control sample and healthy donor PBMC stained with mouse IgG1K isotype labeled with PE (eBiosciences) was used as a negative control to set the gate. The IFN- $\gamma$  positive cells were sorted using FACS Aria (BD Biosciences, Franklin Lakes, New Jersey).

A Next GEM Chip G was loaded with approximately 10,000 cells and Chromium Next GEM Single Cell 5’ Library Gel Bead Kit v1.1 reagent (10X Genomics, Pleasanton, CA). An emulsion was generated with the Chromium Controller (10X Genomics). Gene expression (GEX) libraries were prepared with the Chromium Single Cell 5’ Library Construction Kit and TCR libraries were prepared with the Chromium Single Cell V(D)J Enrichment Kit, Human T Cell (10X Genomics). A low-pass surveillance sequencing run of both libraries were performed on separate

Illumina mid-output MiniSeq flow cells (GEX library Read1:26bp, Read2:91bp, TCR library Read1:150bp, Read2:150bp). Sequencing was scaled up on an Illumina NextSeq 500 with a high-output 150-cycle v2.5 kit for the GEX library and a mid-output 300-cycle v2.5 kit for the TCR library; both runs used identical read lengths as on the MiniSeq. Data was aggregated from both runs.

Sequencing data were first processed by a Cell Ranger pipeline (v4.0.0; 10X Genomics). Gene expression sequencing data were mapped to human reference (GRCh38-2020A) dataset, and TCR sequencing data were mapped to human TCR reference (GRCh38-alts-ensembl-4.0.0) dataset. Gene expression profiles were further analyzed by Loupe Browser (v4.2.0; 10X Genomics) and TCR data were further analyzed by Loupe V(D)J Browser (v3.0.0; 10X Genomics). T cell clonotypes were defined based on TCR V $\beta$  CDR3 nucleotide sequences after removing single cells containing only  $\alpha$  chains and those containing two different TCR V $\beta$  CDR3 nucleotide sequences (likely doublets). For calculating the frequencies of  $\geq 5\%$  clonotypes (Table 3), single cells with two or more copies were included. Full-length TCR $\alpha/\beta$  amino acid sequences were obtained by the Loupe V(D)J Browser.

### **Data availability**

The bulk TCR V $\beta$  deep sequencing data are available in immuneACCESS (immuneACCESS DOI: <https://DOI10.21417/TS2020HPV>).

### **Statistical analysis**

A paired *t*-test was performed to assess the significant changing of spot forming units (i.e., IFN- $\gamma$  secreting cells) before and after vaccination in ELISPOT assay. The number of T cells between study visits in PBMC, stimulated CD3 T cells, LBC, and FFPE were compared using Wilcoxon matched-pairs signed-ranks test (GraphPad InStat 3, GraphPad Software, San Diego, CA). A *p* value  $< 0.05$  was considered statistically significant.

## **Acknowledgements**

This work was supported by the grant from the National Institutes of Health (R01CA143130, USA), Drs. Mae and Anderson Nettleship Endowed Chair of Oncologic Pathology (31005156, USA), and the Arkansas Biosciences Institute (the major component of the Tobacco Settlement Proceeds Act of 2000, G1-52249-01, USA).

## **Authors' Contributions**

M.N., D.J., To.S. and Y.-C. L developed the concepts and designed this project. Ta.S., S.S., T. E., O. W. S., C.M.Q., H.C. and M.N. performed the experiments. Ta.S., B.L. and M.N. wrote the manuscript, and all authors edited it. Ta.S., S.S., H.J.S., E.P., and M.N. performed statistical and bioinformatics analyses.

## **Competing Interests**

M.N. is one of the inventors named in the patents and patent applications for the HPV therapeutic vaccine (PepCan). The remaining authors declare no conflicts of interest.



## Figure Legends

### **Figure 1. The Phase I clinical trial design and routine immune monitoring assays. A.**

Clinical trial design of the Phase I study. Vaccination (PepCan) visits were scheduled 3 weeks apart for patients who had biopsy-confirmed cervical high-grade squamous intraepithelial lesions (HSILs, i.e. CIN grade 2 or 3). Blood draws were performed pre-vaccination, and post-2 and post-4 vaccinations. Cervical local samples (LBC and FFPE) were collected pre-vaccination and post-4 vaccinations. FFPE samples were prepared from a pre-vaccination cervical biopsy and from loop electrical excision procedure (LEEP) biopsy post-4 vaccinations. **B.** Immunogenic HPV16 E6 and E7 regions were determined for each vaccine phase using ELISPOT assay. In pre-vaccine phase, positive responses (i.e., at least twice the media control) were detected in the E6 16-40, E6 31-55, and E6 106-130 regions. Positive responses were seen in the E6 1-25, E6 106-130, E6 136-158, and E7 1-25 regions in the post-2 vaccination sample, and in the E6 31-55, E6 91-115, and E7 46-70 regions in the post-4 vaccination sample. The increase in the response to the HPV16 E6 91-115 regions was statistically significant (paired *t*-test,  $p=0.023$ ).

Phytohemagglutinin was used as a positive control (not shown). The bars represent mean spot forming units per  $1 \times 10^6$  CD3 T cells, and error bars represent standard error of means. **C.** The Th1 level expressed as the percentage of CD4 T cells increased after 4 vaccinations, but Treg and Th2 levels were minimally changed.

### **Figure 2. T cell structures of PBMC stimulated CD3, LBC, and FFPE samples described**

**with multiplexed PCR-based TCR sequencing using genomic DNA.** The T cell structures of the 4 sample types (PBMC, stimulated CD3, LBC, and FFPE) are shown as the total number of T cells defined by nucleotides, productive clonality, fraction of T cells, number of clonotypes

defined by nucleotides, maximum productive frequency, and the quantity of DNA (ng) required per cell.

**Figure 3 Tracking of clonotypes in the peripheral blood and cervix. A.** Tracking of the top 15 clonotypes defined by nucleotides are shown in productive frequency. The top 15 highest frequency clonotypes were significantly decreased after 2 vaccinations (Wilcoxon matched-pairs signed-ranks test,  $p=0.0012$ ), but significantly increased after 4 vaccinations ( $p<0.0001$ ) in PBMC samples calculated using the numbers of T cells. For stimulated CD3 T cell samples, significant increases were seen between pre-vaccination and post-4 vaccinations ( $p=0.034$ ) and between post-2 and post-4 vaccinations samples ( $p=0.0034$ ). A significant increase was seen in LBC samples ( $p<0.0001$ ) but not in FFPE samples. **B.** Venn diagrams of clonotypes defined by nucleotides in PBMC, LBC, and FFPE samples pre-vaccination and post-4 vaccinations. Most clonotypes appear only in one sample type, but there are 17 TCRs present at the pre-vaccination visit and 72 TCRs at the post-4 vaccination visit. **C.** Putatively vaccine-specific clonotypes in LBC samples before and after 4 vaccinations. Seventy putatively vaccine-specific clonotypes were identified through a comparison of post-4 PBMC and pre PBMC samples using the beta-binomial model (shown as red dots with and without black circular borders). Red dots with black circular borders represent these putatively vaccine-specific TCRs present in pre-vaccination LBC sample ( $n=15$ ) and in post-4 vaccination LBC sample ( $n=57$ ). Dark grey dots are not significantly different between pre-vaccination and post-4 vaccinations PBMC samples. Dark grey dots with black circular borders are not significantly increased but are present in the respective LBC sample. Light grey dots with black circular borders are not present in the respective LBC sample.

**Figure 4. t-SNE projections.** The total UMI counts for each cell-barcode is shown in the left panel. Greater UMI counts represent higher RNA content. The right panel shows the assignments of each cell-barcode to clusters showing cells with similar gene expression profile in close proximity.

**Figure 5. Tracking HPV 16 E6 91-115 specific T cells in PBMC, LBC, and FFPE. The TCR sequences of** The TCR V $\alpha$  and V $\beta$  sequences of HPV 16 E6 91-115 specific T cells were determined by sorting and sequencing such cells based in IFN- $\gamma$  secretion upon peptide stimulation. The TCR V $\beta$  CDR3 sequences of top 4 clonotypes ( $\geq 5\%$  of IFN- $\gamma$  secreting cells) are shown in Table 3. The frequencies of these clonotypes in PBMC, LBC, and FFPE at prevaccination (yellow), post-2 vaccinations (blue), and post-4 vaccinations (red) time points are shown. All 4 vaccine-specific clonotypes in PBMC and LBC increased in frequency after 4 vaccinations. On the other hand, data from FFPE were not as informative.

## Tables

**Table 1. Complete blood count with differentials**

| Test                     | Reference range | Pre  | Post-2 | Post-4       |
|--------------------------|-----------------|------|--------|--------------|
| WBC (K/ $\mu$ L)         | 3-12            | 7.92 | 8.14   | <b>13.94</b> |
| Hemoglobin (g/dL)        | 11.5-16         | 12.9 | 13.4   | 13.9         |
| Hematocrit (%)           | 34-47           | 39.1 | 41.2   | 42.7         |
| Platelet (K/ $\mu$ L)    | 150-500         | 225  | 225    | 237          |
| Neutrophils (K/ $\mu$ L) | 2.5-8.2         | 4.5  | 5      | 7            |
| Lymphocyte (K/ $\mu$ L)  | 1-4.8           | 2.5  | 2.3    | <b>5.5</b>   |
| Monocytes (K/ $\mu$ L)   | 0.1-1           | 0.6  | 0.6    | 0.9          |
| Eosinophils (K/ $\mu$ L) | 0-0.4           | 0.3  | 0.2    | 0.4          |
| Basophils (K/ $\mu$ L)   | 0-0.22          | 0.02 | 0.02   | 0.03         |

Bold indicates values outside of the reference range.

**Table 2. Sample characteristics.**

| Sample types   | Vaccines time | Used sample amount      | Input DNA (ng) | T cells by nucleotides | Clonotypes by nucleotides | T cells by amino acids | Clonotypes by amino acids |
|----------------|---------------|-------------------------|----------------|------------------------|---------------------------|------------------------|---------------------------|
| PBMC           | Pre           | $8 \times 10^6$ cells   | 2,852          | 252,926                | 195,744                   | 252,926                | 187,972                   |
|                | Post-2        | $8 \times 10^6$ cells   | 2,861          | 253,155                | 199,650                   | 253,155                | 191,481                   |
|                | Post-4        | $8 \times 10^6$ cells   | 3,428          | 313,245                | 149,604                   | 313,245                | 144,519                   |
| Stimulated CD3 | Pre           | $6.8 \times 10^6$ cells | 1,204          | 166,173                | 88,391                    | 166,173                | 85,767                    |
|                | Post-2        | $6.5 \times 10^6$ cells | 1,202          | 158,747                | 78,715                    | 158,747                | 76,644                    |
|                | Post-4        | $2 \times 10^6$ cells   | 1,202          | 99,701                 | 29,150                    | 99,701                 | 28,643                    |
| LBC            | Pre           | 1,200 $\mu$ L           | 318            | 814                    | 699                       | 814                    | 694                       |
|                | Post-4        | 800 $\mu$ L             | 930            | 10,731                 | 6748                      | 10,731                 | 6,693                     |
| FFPE           | Pre           | Five 5 $\mu$ scrolls    | 392            | 403                    | 372                       | 403                    | 359                       |
|                | Post-4        | Five 5 $\mu$ scrolls    | 934            | 382                    | 344                       | 382                    | 331                       |

T cell clone abundances were counted using complementarity determining region 3 (CDR3) nucleotide or amino acid sequences. PBMC: peripheral blood mononuclear cells, CD3: CD3 stimulated with HPV16 E6 and E7 antigens, LBC: liquid-based cytology, FFPE: formalin-fixed paraffin-embedded.

**Table 3. TCR  $\beta$  CDR3 sequences of clonotypes with specificity to HPV 16 E6 91-115 and  $\geq 5\%$  frequency.**

| Clonotype | Number | Frequency (%) | Amino acid sequence |
|-----------|--------|---------------|---------------------|
| 1         | 2,615  | 33.3          | CASSPTSGGLTWDEQYF   |
| 2         | 1,340  | 17.0          | CASSHNSGREGNEQFF    |
| 3         | 772    | 9.8           | CASSFPGENEQFF       |
| 4         | 678    | 8.6           | CASSWEAGQETQYF      |

## References

1. HPV-Associated Cancer Statistics. Vol. 2019 (Centers for Disease Control and Prevention, 2019).
2. Cancer Facts & Figures 2019. (American Cancer Society, 2019).
3. de Martel, C., Plummer, M., Vignat, J. & Franceschi, S. Worldwide burden of cancer attributable to HPV by site, country and HPV type. *Int J Cancer* **141**, 664-670 (2017).
4. Hildesheim, A., *et al.* Effect of human papillomavirus 16/18 L1 viruslike particle vaccine among young women with preexisting infection: a randomized trial. *JAMA* **298**, 743-753 (2007).
5. Massad, L.S., *et al.* 2012 updated consensus guidelines for the management of abnormal cervical cancer screening tests and cancer precursors. *Obstet Gynecol* **121**, 829-846 (2013).
6. Bruinsma, F.J. & Quinn, M.A. The risk of preterm birth following treatment for precancerous changes in the cervix: a systematic review and meta-analysis. *BJOG* **118**, 1031-1041 (2011).
7. Coleman, H.N., *et al.* Human papillomavirus type 16 viral load is decreased following a therapeutic vaccination. *Cancer Immunol Immunother* **65**, 563-573 (2016).
8. Greenfield, W.W., *et al.* A phase I dose-escalation clinical trial of a peptide-based human papillomavirus therapeutic vaccine with skin test reagent as a novel vaccine adjuvant for treating women with biopsy-proven cervical intraepithelial neoplasia 2/3. *Oncoimmunology* **4**, e1031439 (2015).
9. Nieminen, P., *et al.* Efficacy and safety of RO5217990 treatment in patients with high grade cervical intraepithelial neoplasia (CIN2/3). in *28th International Papillomavirus Conference* (Puerto Rico, 2012).
10. Cui, J.H., *et al.* TCR Repertoire as a Novel Indicator for Immune Monitoring and Prognosis Assessment of Patients With Cervical Cancer. *Front Immunol* **9**, 2729 (2018).
11. Lang Kuhs, K.A., *et al.* T cell receptor repertoire among women who cleared and failed to clear cervical human papillomavirus infection: An exploratory proof-of-principle study. *PLoS One* **13**, e0178167 (2018).
12. Morrow, M.P., *et al.* Augmentation of cellular and humoral immune responses to HPV16 and HPV18 E6 and E7 antigens by VGX-3100. *Mol Ther Oncolytics* **3**, 16025 (2016).
13. Laydon, D.J., Bangham, C.R. & Asquith, B. Estimating T-cell repertoire diversity: limitations of classical estimators and a new approach. *Philos Trans R Soc Lond B Biol Sci* **370**(2015).
14. Fink, K. Can We Improve Vaccine Efficacy by Targeting T and B Cell Repertoire Convergence? *Front Immunol* **10**, 110 (2019).
15. Hopkins, A.C., *et al.* T cell receptor repertoire features associated with survival in immunotherapy-treated pancreatic ductal adenocarcinoma. *JCI Insight* **3**(2018).
16. Inoue, H., *et al.* Intratumoral expression levels of PD-L1, GZMA, and HLA-A along with oligoclonal T cell expansion associate with response to nivolumab in metastatic melanoma. *Oncoimmunology* **5**, e1204507 (2016).
17. Tumeh, P.C., *et al.* PD-1 blockade induces responses by inhibiting adaptive immune resistance. *Nature* **515**, 568-571 (2014).
18. Rytlewski, J., *et al.* Model to improve specificity for identification of clinically-relevant expanded T cells in peripheral blood. *PLoS One* **14**, e0213684 (2019).

19. Durst, M., Gissmann, L., Ikenberg, H. & zur Hausen, H. A papillomavirus DNA from a cervical carcinoma and its prevalence in cancer biopsy samples from different geographic regions. *Proc Natl Acad Sci U S A* **80**, 3812-3815 (1983).
20. Schiffman, M., *et al.* Carcinogenic human papillomavirus infection. *Nat Rev Dis Primers* **2**, 16086 (2016).
21. Van Damme, P., *et al.* GTL001, A Therapeutic Vaccine for Women Infected with Human Papillomavirus 16 or 18 and Normal Cervical Cytology: Results of a Phase I Clinical Trial. *Clin Cancer Res* **22**, 3238-3248 (2016).
22. Trimble, C.L., *et al.* Safety, efficacy, and immunogenicity of VGX-3100, a therapeutic synthetic DNA vaccine targeting human papillomavirus 16 and 18 E6 and E7 proteins for cervical intraepithelial neoplasia 2/3: a randomised, double-blind, placebo-controlled phase 2b trial. *Lancet* (2015).
23. ClinicalTrials.gov. Vol. 2014.
24. Maciag, P.C., Radulovic, S. & Rothman, J. The first clinical use of a live-attenuated *Listeria monocytogenes* vaccine: a Phase I safety study of Lm-LLO-E7 in patients with advanced carcinoma of the cervix. *Vaccine* **27**, 3975-3983 (2009).
25. Melief, C.J.M., *et al.* Strong vaccine responses during chemotherapy are associated with prolonged cancer survival. *Sci Transl Med* **12**(2020).
26. Massarelli, E., *et al.* Combining Immune Checkpoint Blockade and Tumor-Specific Vaccine for Patients With Incurable Human Papillomavirus 16-Related Cancer: A Phase 2 Clinical Trial. *JAMA Oncol* **5**, 67-73 (2019).
27. Godi, A., *et al.* Durability of the neutralizing antibody response to vaccine and non-vaccine HPV types 7 years following immunization with either Cervarix(R) or Gardasil(R) vaccine. *Vaccine* **37**, 2455-2462 (2019).
28. Sankaranarayanan, R., *et al.* Immunogenicity and HPV infection after one, two, and three doses of quadrivalent HPV vaccine in girls in India: a multicentre prospective cohort study. *Lancet Oncol* **17**, 67-77 (2016).
29. Lo Presti, E., Dieli, F. & Meraviglia, S. Tumor-Infiltrating gammadelta T Lymphocytes: Pathogenic Role, Clinical Significance, and Differential Programming in the Tumor Microenvironment. *Front Immunol* **5**, 607 (2014).
30. Lu, Y.C., *et al.* An Efficient Single-Cell RNA-Seq Approach to Identify Neoantigen-Specific T Cell Receptors. *Mol Ther* **26**, 379-389 (2018).
31. Morgan, R.A., *et al.* Cancer regression in patients after transfer of genetically engineered lymphocytes. *Science* **314**, 126-129 (2006).
32. Draper, L.M., *et al.* Targeting of HPV-16+ Epithelial Cancer Cells by TCR Gene Engineered T Cells Directed against E6. *Clin Cancer Res* **21**, 4431-4439 (2015).
33. Robins, H.S., *et al.* Comprehensive assessment of T-cell receptor beta-chain diversity in alphabeta T cells. *Blood* **114**, 4099-4107 (2009).
34. Lefranc, M.P., *et al.* IMGT(R), the international ImMunoGeneTics information system(R) 25 years on. *Nucleic Acids Res* **43**, D413-422 (2015).
35. Yousfi Monod, M., Giudicelli, V., Chaume, D. & Lefranc, M.P. IMGT/JunctionAnalysis: the first tool for the analysis of the immunoglobulin and T cell receptor complex V-J and V-D-J JUNCTIONS. *Bioinformatics* **20 Suppl 1**, i379-385 (2004).
36. Wu, D., *et al.* Detection of minimal residual disease in B lymphoblastic leukemia by high-throughput sequencing of IGH. *Clin Cancer Res* **20**, 4540-4548 (2014).
37. Biotechnologies, A.

38. Coleman, H.A., Wang, X., Greenfield, W.W. & Nakagawa, M. A Human Papillomavirus Type 16 E6 52-62 CD4 T-Cell Epitope Restricted by the HLA-DR11 Molecule Described in an Epitope Hotspot. *MOJ Immunology* **1**, 00018 (2014).
39. Nakagawa, M., Kim, K.H., Gillam, T.M. & Moscicki, A.B. HLA class I binding promiscuity of the CD8 T-cell epitopes of human papillomavirus type 16 E6 protein. *J Virol* **81**, 1412-1423 (2007).
40. Nakagawa, M., Kim, K.H. & Moscicki, A.B. Different methods of identifying new antigenic epitopes of human papillomavirus type 16 E6 and E7 proteins. *Clin Diagn Lab Immunol* **11**, 889-896 (2004).
41. Wang, X., Greenfield, W.W., Coleman, H.N., James, L.E. & Nakagawa, M. Use of Interferon-gamma Enzyme-linked Immunospot Assay to Characterize Novel T-cell Epitopes of Human Papillomavirus. *J Vis Exp* (2012).
42. Wang, X., Santin, A.D., Bellone, S., Gupta, S. & Nakagawa, M. A novel CD4 T-cell epitope described from one of the cervical cancer patients vaccinated with HPV 16 or 18 E7-pulsed dendritic cells. *Cancer Immunol Immunother* **58**, 301-308 (2009).



**Figure 1**

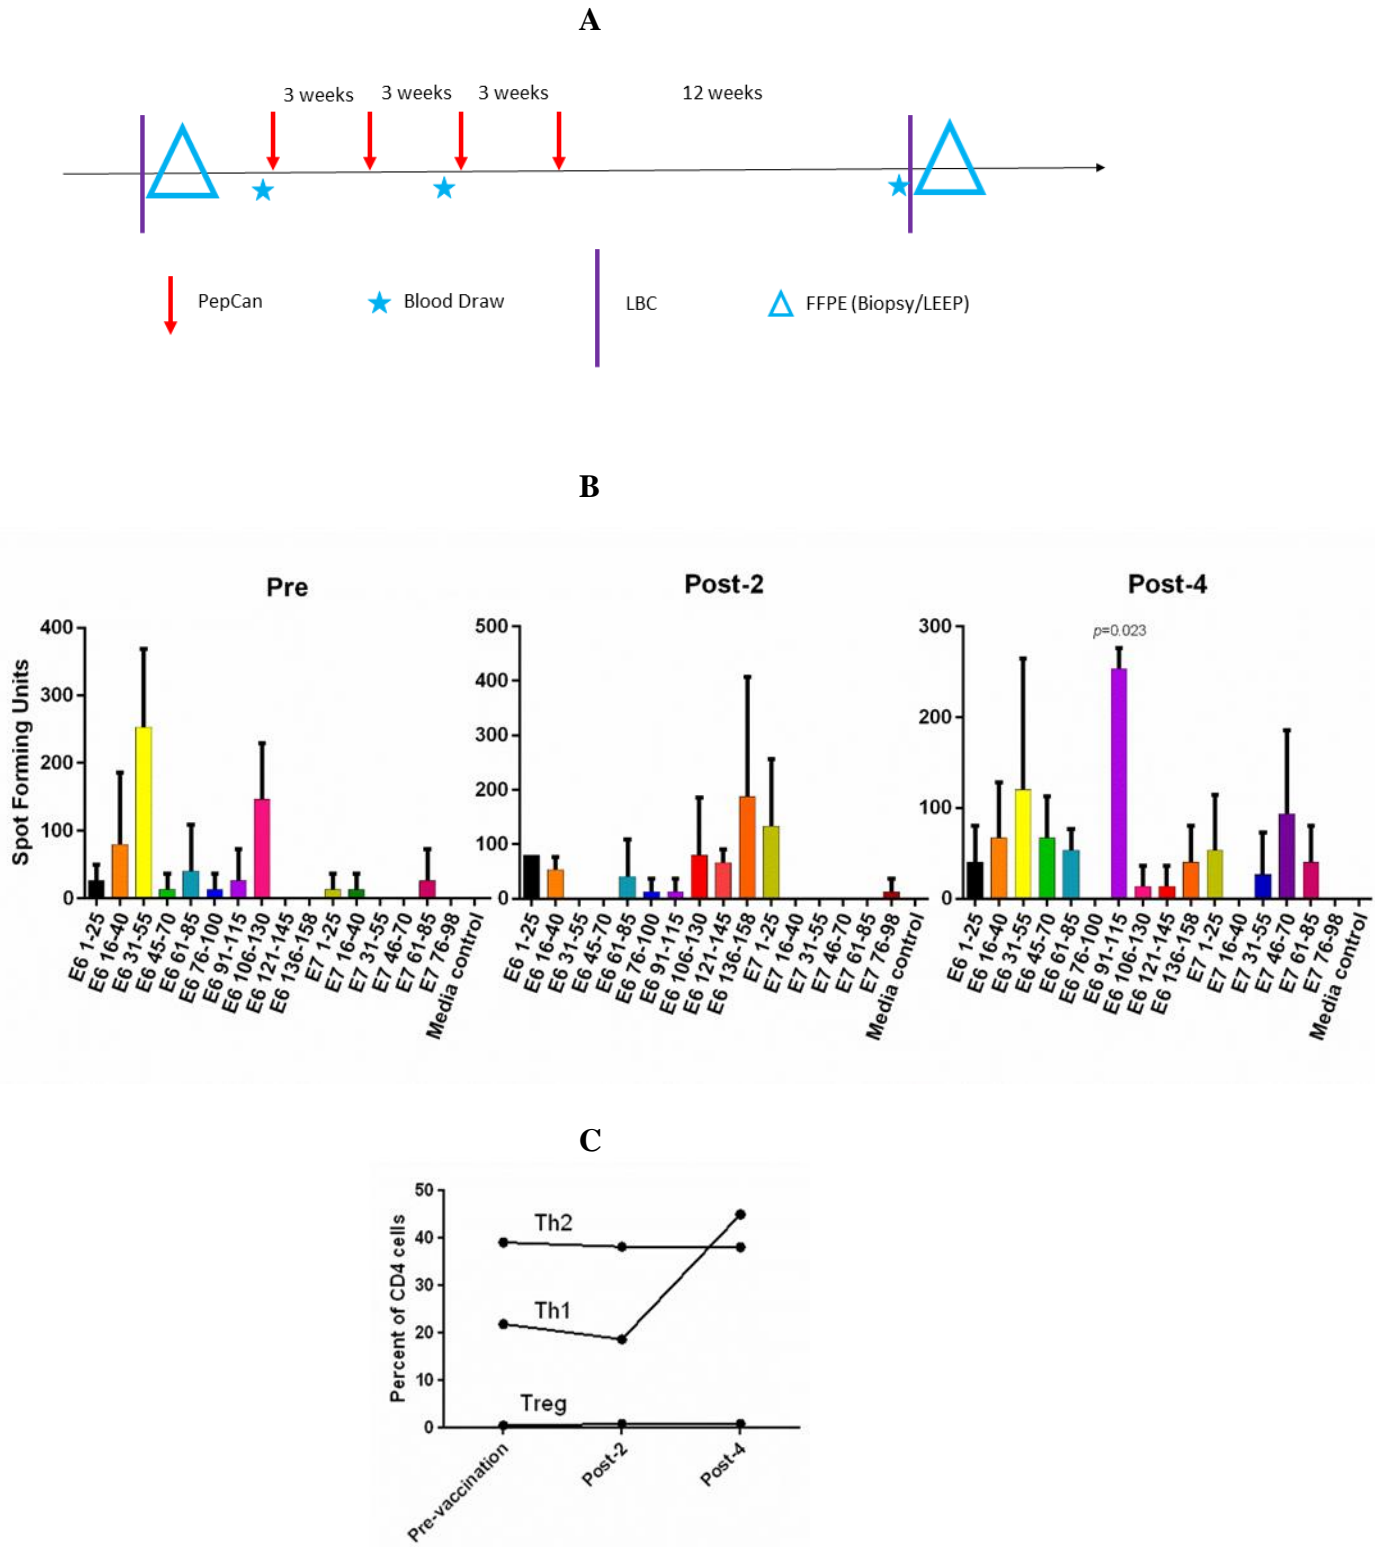

Figure 2

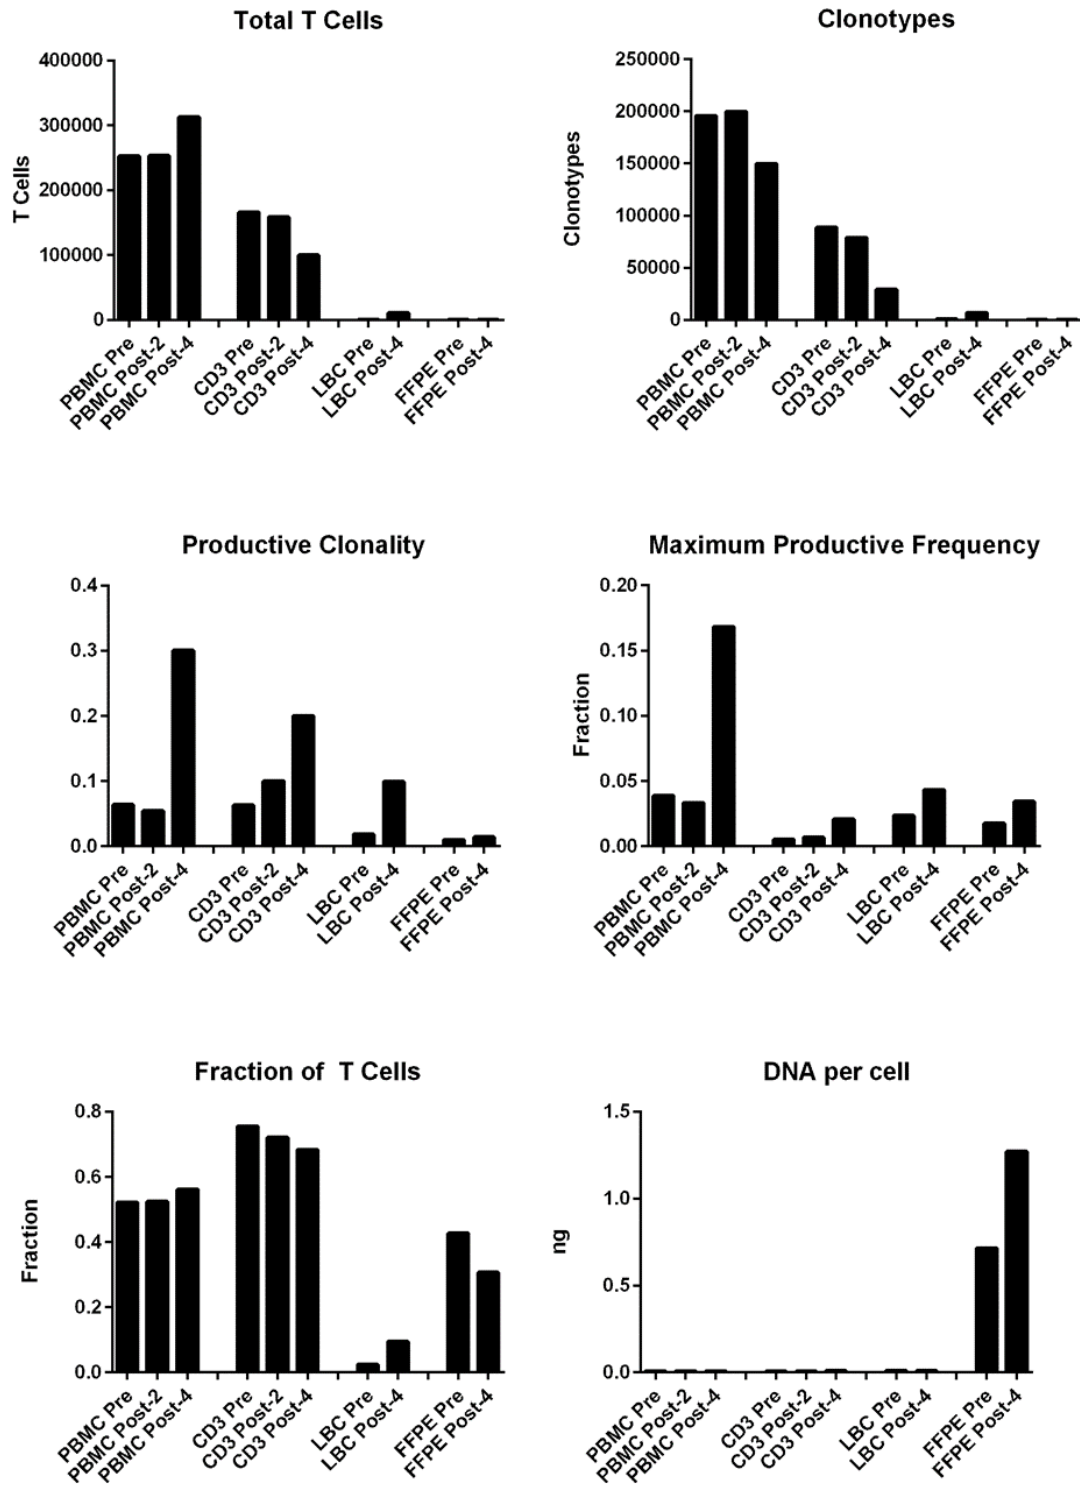

**Figure 3**

**A**

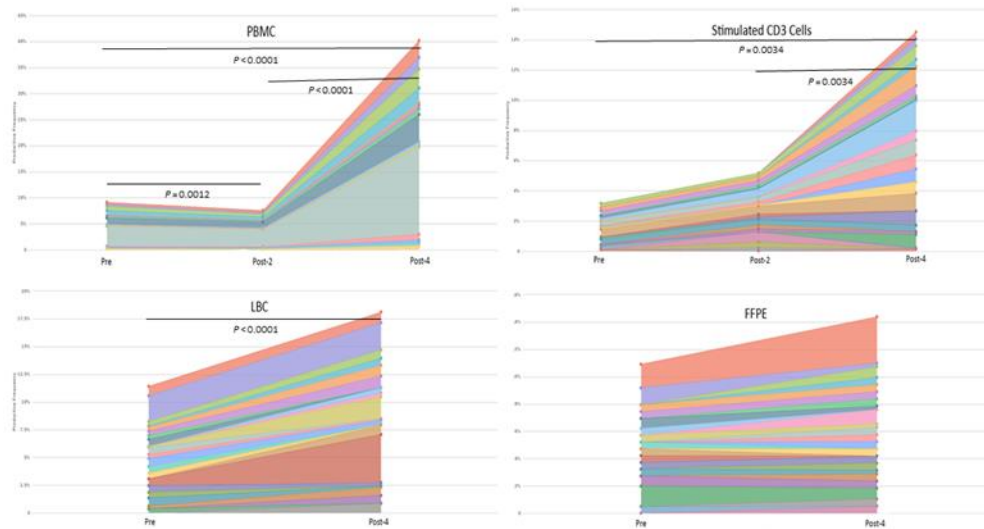

**B**

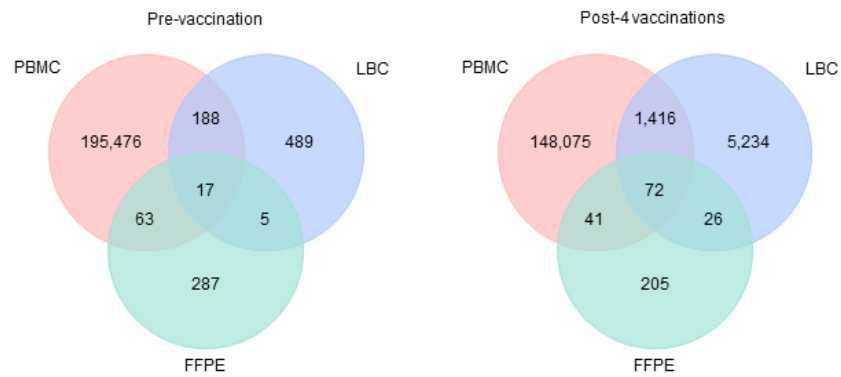

**C**

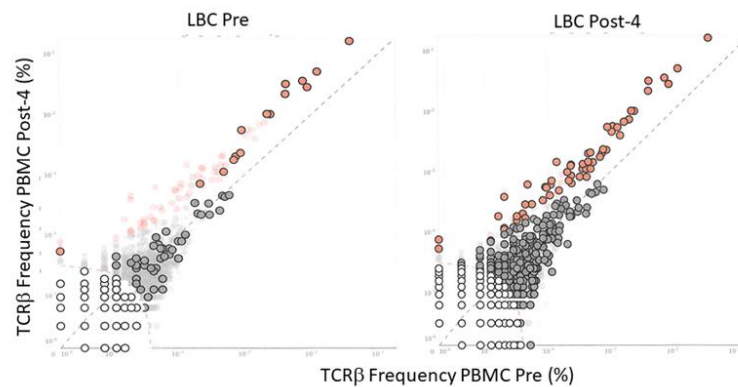

**Figure 4**

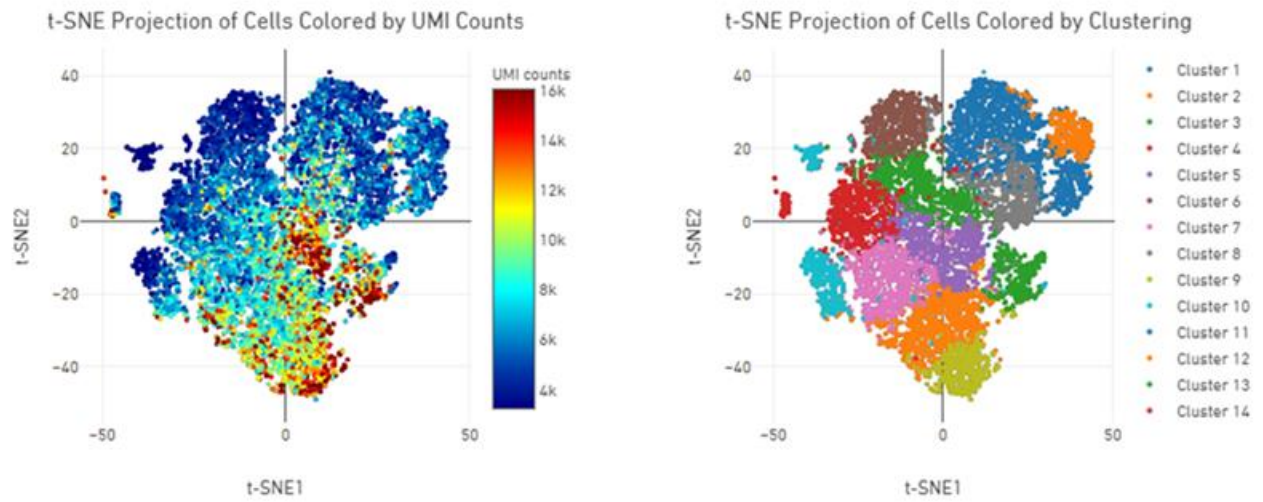

**Figure 5**

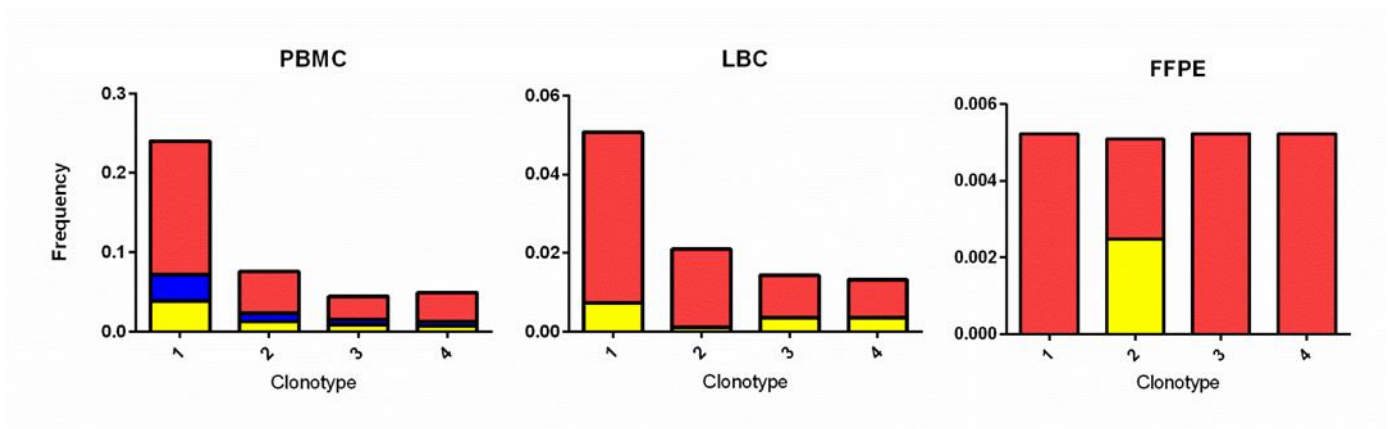

Source: https://www.biorxiv.org/content/biorxiv/early/2020/11/08/2020.11.07.364844.full.pdf
